# Supplementary material for: Scan–rescan reproducibility of segmental aortic wall shear stress as assessed by phase-specific segmentation with 4D flow MRI in healthy volunteers
Source: PubMed Central journal article supplement (PMC6132557; doi:10.1007/s10334-018-0688-6), 2018-05-26
Supplement: 10334_2018_688_MOESM1_ESM.pdf [file 10334_2018_688_MOESM1_ESM.pdf]

**Supplementary Table 1** Intraobserver variability of segmental WSS analysis of the *peak systolic cardiac phase-2* from the scan exams

|                     | WSSmax (mPa)          |                                             |         |              |          |      | WSSmean (mPa)         |                                             |         |              |          |      |
|---------------------|-----------------------|---------------------------------------------|---------|--------------|----------|------|-----------------------|---------------------------------------------|---------|--------------|----------|------|
|                     | Bland-Altman          |                                             | COV (%) | Correlation* |          | ICC  | Bland-Altman          |                                             | COV (%) | Correlation* |          | ICC  |
|                     | Mean difference (mPa) | Limits of agreement ( $\pm 2\sigma$ ) (mPa) |         | <i>r</i>     | <i>P</i> |      | Mean difference (mPa) | Limits of agreement ( $\pm 2\sigma$ ) (mPa) |         | <i>r</i>     | <i>P</i> |      |
| <b>Proximal AAO</b> | 53.2                  | 250.0                                       | 4       | 0.95         | <0.001   | 0.97 | 71.1                  | 127.1                                       | 5       | 0.96         | <0.001   | 0.98 |
| <b>Distal AAO</b>   | -51.7                 | 483.3                                       | 9       | 0.76         | 0.011    | 0.91 | 5.6                   | 53.8                                        | 2       | 0.99         | <0.001   | 0.99 |
| <b>Aortic arch</b>  | -11.6                 | 164.8                                       | 4       | 0.98         | <0.001   | 0.97 | -3.0                  | 50.0                                        | 2       | 0.94         | <0.001   | 0.98 |
| <b>Proximal DAo</b> | 1.2                   | 115.9                                       | 3       | 0.93         | <0.001   | 0.95 | -6.1                  | 46.9                                        | 2       | 0.94         | <0.001   | 0.98 |
| <b>Distal DAo</b>   | -39.9                 | 239.0                                       | 6       | 0.94         | <0.001   | 0.89 | -10.4                 | 95.6                                        | 4       | 0.92         | <0.001   | 0.94 |

\*Spearman correlation coefficient

AAo ascending aorta, DAo descending aorta, COV coefficient of variation, ICC intraclass correlation coefficient

**Title:** Scan-rescan reproducibility of segmental aortic wall shear stress as assessed by phase-specific segmentation with 4D flow MRI in healthy volunteers

**Journal:** Magnetic Resonance Materials in Physics, Biology and Medicine

**Authors** Roel LF van der Palen, Arno AW Roest, Pieter J van den Boogaard, Albert de Roos, Nico A Blom, Jos JM Westenberg

**Corresponding author:** Roel LF van der Palen; Division of Pediatric Cardiology, department of Pediatrics, Leiden University Medical Center, Leiden, the Netherlands. Albinusdreef 2, 2333 ZA, Leiden, the Netherlands. E-mail: r.vanderpalen@lumc.nl
