# Supplementary material for: Scan–rescan reproducibility of segmental aortic wall shear stress as assessed by phase-specific segmentation with 4D flow MRI in healthy volunteers
Source: PubMed Central journal article supplement (PMC6132557; doi:10.1007/s10334-018-0688-6), 2018-05-26
Supplement: 10334_2018_688_MOESM2_ESM.pdf [file 10334_2018_688_MOESM2_ESM.pdf]

**Supplementary Table 2** Intraobserver variability of segmental WSS analysis of the *peak systolic cardiac phase-1* from the scan exams

|                     | WSSmax (mPa)          |                                             |         |              |          |      | WSSmean (mPa)         |                                             |         |              |          |      |
|---------------------|-----------------------|---------------------------------------------|---------|--------------|----------|------|-----------------------|---------------------------------------------|---------|--------------|----------|------|
|                     | Bland-Altman          |                                             | COV (%) | Correlation* |          | ICC  | Bland-Altman          |                                             | COV (%) | Correlation* |          | ICC  |
|                     | Mean difference (mPa) | Limits of agreement ( $\pm 2\sigma$ ) (mPa) |         | <i>r</i>     | <i>P</i> |      | Mean difference (mPa) | Limits of agreement ( $\pm 2\sigma$ ) (mPa) |         | <i>r</i>     | <i>P</i> |      |
| <b>Proximal AAo</b> | 182.6                 | 815.1                                       | 14      | 0.92         | <0.001   | 0.87 | 81.0                  | 114.5                                       | 4       | 0.98         | <0.001   | 0.98 |
| <b>Distal AAo</b>   | -40.8                 | 295.3                                       | 6       | 0.89         | 0.001    | 0.94 | 11.0                  | 47.0                                        | 2       | 0.96         | <0.001   | 1.00 |
| <b>Aortic arch</b>  | 27.6                  | 159.8                                       | 4       | 0.99         | <0.001   | 0.97 | 14.8                  | 50.7                                        | 2       | 0.96         | <0.001   | 0.98 |
| <b>Proximal DAo</b> | -24.7                 | 184.6                                       | 4       | 0.99         | <0.001   | 0.97 | -1.0                  | 62.8                                        | 2       | 0.95         | <0.001   | 0.98 |
| <b>Distal DAo</b>   | -137.3                | 532.5                                       | 11      | 0.66         | 0.038    | 0.78 | -10.5                 | 120.9                                       | 4       | 0.82         | 0.004    | 0.91 |

\*Spearman correlation coefficient

AAo ascending aorta, DAo descending aorta, COV coefficient of variation, ICC intraclass correlation coefficient

**Title:** Scan-rescan reproducibility of segmental aortic wall shear stress as assessed by phase-specific segmentation with 4D flow MRI in healthy volunteers

**Journal:** Magnetic Resonance Materials in Physics, Biology and Medicine

**Authors** Roel LF van der Palen, Arno AW Roest, Pieter J van den Boogaard, Albert de Roos, Nico A Blom, Jos JM Westenberg

**Corresponding author:** Roel LF van der Palen; Division of Pediatric Cardiology, department of Pediatrics, Leiden University Medical Center, Leiden, the Netherlands.

Albinusdreef 2, 2333 ZA, Leiden, the Netherlands. E-mail: r.vanderpalen@lumc.nl
