# Supplementary material for: Scan–rescan reproducibility of segmental aortic wall shear stress as assessed by phase-specific segmentation with 4D flow MRI in healthy volunteers
Source: PubMed Central journal article supplement (PMC6132557; doi:10.1007/s10334-018-0688-6), 2018-05-26
Supplement: 10334_2018_688_MOESM5_ESM.pdf [file 10334_2018_688_MOESM5_ESM.pdf]

**Supplementary Table 5** Interobserver variability of segmental WSS analysis of the *peak systolic cardiac phase-2* from the scan exams

|                      | WSSmax (mPa)          |                                             |         |              |          |      | WSSmean (mPa)         |                                             |         |              |          |      |
|----------------------|-----------------------|---------------------------------------------|---------|--------------|----------|------|-----------------------|---------------------------------------------|---------|--------------|----------|------|
|                      | Bland-Altman          |                                             | COV (%) | Correlation* |          | ICC  | Bland-Altman          |                                             | COV (%) | Correlation* |          | ICC  |
|                      | Mean difference (mPa) | Limits of agreement ( $\pm 2\sigma$ ) (mPa) |         | <i>r</i>     | <i>P</i> |      | Mean difference (mPa) | Limits of agreement ( $\pm 2\sigma$ ) (mPa) |         | <i>r</i>     | <i>P</i> |      |
| <b>Proximal AAO</b>  | -61.9                 | 578.1                                       | 9       | 0.84         | 0.002    | 0.86 | -68.9                 | 323.8                                       | 11      | 0.76         | 0.011    | 0.86 |
| <b>Distal AAO</b>    | -99.0                 | 387.1                                       | 7       | 0.82         | 0.004    | 0.94 | -1.7                  | 48.5                                        | 2       | 0.99         | <0.001   | 0.99 |
| <b>Aortic arch</b>   | -1.5                  | 205.8                                       | 4       | 0.96         | <0.001   | 0.96 | 21.5                  | 74.6                                        | 4       | 0.95         | <0.001   | 0.95 |
| <b>Proximal DAAo</b> | -70.2                 | 234.2                                       | 6       | 0.84         | 0.002    | 0.84 | -6.8                  | 43.4                                        | 2       | 0.98         | <0.001   | 0.98 |
| <b>Distal DAAo</b>   | -142.4                | 230.7                                       | 6       | 0.95         | <0.001   | 0.90 | -14.3                 | 101.5                                       | 4       | 0.93         | <0.001   | 0.94 |

\*Spearman correlation coefficient

AAo ascending aorta, DAAo descending aorta, COV coefficient of variation, ICC intraclass correlation coefficient

**Title:** Scan-rescan reproducibility of segmental aortic wall shear stress as assessed by phase-specific segmentation with 4D flow MRI in healthy volunteers

**Journal:** Magnetic Resonance Materials in Physics, Biology and Medicine

**Authors** Roel LF van der Palen, Arno AW Roest, Pieter J van den Boogaard, Albert de Roos, Nico A Blom, Jos JM Westenberg

**Corresponding author:** Roel LF van der Palen; Division of Pediatric Cardiology, department of Pediatrics, Leiden University Medical Center, Leiden, the Netherlands. Albinusdreef 2, 2333 ZA, Leiden, the Netherlands. E-mail: r.vanderpalen@lumc.nl
