# Supplementary material for: Scan–rescan reproducibility of segmental aortic wall shear stress as assessed by phase-specific segmentation with 4D flow MRI in healthy volunteers
Source: PubMed Central journal article supplement (PMC6132557; doi:10.1007/s10334-018-0688-6), 2018-05-26
Supplement: 10334_2018_688_MOESM6_ESM.pdf [file 10334_2018_688_MOESM6_ESM.pdf]

**Supplementary Table 6** Interobserver variability of segmental WSS analysis of the *peak systolic cardiac phase-1* from the scan exams

|                      | WSSmax (mPa)          |                                             |         |              |          |      | WSSmean (mPa)         |                                             |         |              |          |      |
|----------------------|-----------------------|---------------------------------------------|---------|--------------|----------|------|-----------------------|---------------------------------------------|---------|--------------|----------|------|
|                      | Bland-Altman          |                                             | COV (%) | Correlation* |          | ICC  | Bland-Altman          |                                             | COV (%) | Correlation* |          | ICC  |
|                      | Mean difference (mPa) | Limits of agreement ( $\pm 2\sigma$ ) (mPa) |         | <i>r</i>     | <i>P</i> |      | Mean difference (mPa) | Limits of agreement ( $\pm 2\sigma$ ) (mPa) |         | <i>r</i>     | <i>P</i> |      |
| <b>Proximal AAO</b>  | -27.7                 | 710.2                                       | 12      | 0.94         | <0.001   | 0.91 | -50.4                 | 261.7                                       | 9       | 0.88         | 0.001    | 0.92 |
| <b>Distal AAO</b>    | -150.8                | 468.5                                       | 10      | 0.79         | 0.006    | 0.88 | 9.6                   | 42.7                                        | 2       | 0.99         | <0.001   | 1.00 |
| <b>Aortic arch</b>   | 33.1                  | 114.0                                       | 3       | 0.99         | <0.001   | 0.99 | 15.9                  | 31.5                                        | 1       | 0.99         | <0.001   | 0.99 |
| <b>Proximal DAAo</b> | -78.4                 | 194.0                                       | 4       | 0.95         | <0.001   | 0.97 | -16.1                 | 65.5                                        | 2       | 0.96         | <0.001   | 0.98 |
| <b>Distal DAAo</b>   | -302.2                | 496.3                                       | 10      | 0.78         | 0.008    | 0.81 | -34.1                 | 103.7                                       | 3       | 0.95         | <0.001   | 0.93 |

\*Spearman correlation coefficient

AAo ascending aorta, DAAo descending aorta, COV coefficient of variation, ICC intraclass correlation coefficient

**Title:** Scan-rescan reproducibility of segmental aortic wall shear stress as assessed by phase-specific segmentation with 4D flow MRI in healthy volunteers

**Journal:** Magnetic Resonance Materials in Physics, Biology and Medicine

**Authors** Roel LF van der Palen, Arno AW Roest, Pieter J van den Boogaard, Albert de Roos, Nico A Blom, Jos JM Westenberg

**Corresponding author:** Roel LF van der Palen; Division of Pediatric Cardiology, department of Pediatrics, Leiden University Medical Center, Leiden, the Netherlands. Albinusdreef 2, 2333 ZA, Leiden, the Netherlands. E-mail: r.vanderpalen@lumc.nl
