# Supplementary material for: Scan–rescan reproducibility of segmental aortic wall shear stress as assessed by phase-specific segmentation with 4D flow MRI in healthy volunteers
Source: Springer Nature journal article supplement (doi:10.1007/s10334-018-0688-6), 2018-05-26
Supplement: MOESM4 [file 15795178]

**Supplementary Table 4** Intraobserver variability of segmental WSS analysis of the *peak systolic cardiac phase+2* from the scan exams

|                      | WSSmax (mPa)          |                                             |         |              |          |      | WSSmean (mPa)         |                                             |         |              |          |      |
|----------------------|-----------------------|---------------------------------------------|---------|--------------|----------|------|-----------------------|---------------------------------------------|---------|--------------|----------|------|
|                      | Bland-Altman          |                                             | COV (%) | Correlation* |          | ICC  | Bland-Altman          |                                             | COV (%) | Correlation* |          | ICC  |
|                      | Mean difference (mPa) | Limits of agreement ( $\pm 2\sigma$ ) (mPa) |         | <i>r</i>     | <i>P</i> |      | Mean difference (mPa) | Limits of agreement ( $\pm 2\sigma$ ) (mPa) |         | <i>r</i>     | <i>P</i> |      |
| <b>Proximal AAO</b>  | 16.4                  | 153.9                                       | 5       | 0.94         | <0.001   | 0.99 | 51.5                  | 85.8                                        | 6       | 1.00         | <0.001   | 0.97 |
| <b>Distal AAO</b>    | -1.1                  | 30.6                                        | 1       | 0.99         | <0.001   | 1.00 | 1.6                   | 28.9                                        | 2       | 0.99         | <0.001   | 1.00 |
| <b>Aortic arch</b>   | 25.1                  | 136.6                                       | 5       | 0.96         | <0.001   | 0.97 | 2.3                   | 51.7                                        | 3       | 0.98         | <0.001   | 0.98 |
| <b>Proximal DAAo</b> | -38.9                 | 209.8                                       | 5       | 0.89         | 0.001    | 0.97 | -15.6                 | 137.8                                       | 7       | 0.92         | <0.001   | 0.92 |
| <b>Distal DAAo</b>   | -49.2                 | 334.8                                       | 8       | 0.93         | <0.001   | 0.94 | -18.1                 | 113.9                                       | 5       | 0.99         | <0.001   | 0.96 |

\*Spearman correlation coefficient

AAo ascending aorta, DAAo descending aorta, COV coefficient of variation, ICC intraclass correlation coefficient

**Title:** Scan-rescan reproducibility of segmental aortic wall shear stress as assessed by phase-specific segmentation with 4D flow MRI in healthy volunteers

**Journal:** Magnetic Resonance Materials in Physics, Biology and Medicine

**Authors** Roel LF van der Palen, Arno AW Roest, Pieter J van den Boogaard, Albert de Roos, Nico A Blom, Jos JM Westenberg

**Corresponding author:** Roel LF van der Palen; Division of Pediatric Cardiology, department of Pediatrics, Leiden University Medical Center, Leiden, the Netherlands. Albinusdreef 2, 2333 ZA, Leiden, the Netherlands. E-mail: r.vanderpalen@lumc.nl
