# Supplementary material for: Scan–rescan reproducibility of segmental aortic wall shear stress as assessed by phase-specific segmentation with 4D flow MRI in healthy volunteers
Source: Springer Nature journal article supplement (doi:10.1007/s10334-018-0688-6), 2018-05-26
Supplement: MOESM8 [file 15795178]

**Supplementary Table 8** Interobserver variability of segmental WSS analysis of the *peak systolic cardiac phase+2* from the scan exams

|                      | WSSmax (mPa)          |                                             |         |              |          |      | WSSmean (mPa)         |                                             |         |              |          |      |
|----------------------|-----------------------|---------------------------------------------|---------|--------------|----------|------|-----------------------|---------------------------------------------|---------|--------------|----------|------|
|                      | Bland-Altman          |                                             | COV (%) | Correlation* |          | ICC  | Bland-Altman          |                                             | COV (%) | Correlation* |          | ICC  |
|                      | Mean difference (mPa) | Limits of agreement ( $\pm 2\sigma$ ) (mPa) |         | <i>r</i>     | <i>P</i> |      | Mean difference (mPa) | Limits of agreement ( $\pm 2\sigma$ ) (mPa) |         | <i>r</i>     | <i>P</i> |      |
| <b>Proximal AAO</b>  | -99.3                 | 407.6                                       | 13      | 0.81         | 0.005    | 0.91 | -29.2                 | 120.3                                       | 7       | 0.89         | <0.001   | 0.93 |
| <b>Distal AAO</b>    | -22.3                 | 125.5                                       | 4       | 0.98         | <0.001   | 0.98 | 7.3                   | 45.9                                        | 3       | 1.0          | <0.001   | 0.99 |
| <b>Aortic arch</b>   | 42.6                  | 153.1                                       | 5       | 0.94         | <0.001   | 0.96 | 9.2                   | 44.8                                        | 3       | 0.98         | <0.001   | 0.98 |
| <b>Proximal DAAo</b> | -75.0                 | 192.9                                       | 5       | 0.84         | 0.002    | 0.97 | -30.6                 | 125.6                                       | 6       | 0.92         | <0.001   | 0.93 |
| <b>Distal DAAo</b>   | -164.0                | 494.3                                       | 11      | 0.77         | 0.009    | 0.88 | -36.6                 | 84.3                                        | 3       | 0.95         | <0.001   | 0.98 |

\*Spearman correlation coefficient

AAo ascending aorta, DAAo descending aorta, COV coefficient of variation, ICC intraclass correlation coefficient

**Title:** Scan-rescan reproducibility of segmental aortic wall shear stress as assessed by phase-specific segmentation with 4D flow MRI in healthy volunteers

**Journal:** Magnetic Resonance Materials in Physics, Biology and Medicine

**Authors** Roel LF van der Palen, Arno AW Roest, Pieter J van den Boogaard, Albert de Roos, Nico A Blom, Jos JM Westenberg

**Corresponding author:** Roel LF van der Palen; Division of Pediatric Cardiology, department of Pediatrics, Leiden University Medical Center, Leiden, the Netherlands. Albinusdreef 2, 2333 ZA, Leiden, the Netherlands. E-mail: r.vanderpalen@lumc.nl
